# Supplementary material for: Retention of α-pinene oxidation products and nitro-aromatic compounds during riming
Source: Copernicus journal article supplement (doi:10.5194/egusphere-2024-1443), 2024-06-14
Supplement: Supplementary file 1 [file egusphere-2024-1443-supplement.pdf]

*Supplement of*

## **Retention of $\alpha$ -pinene oxidation products and nitro-aromatic compounds during riming**

Christine Borchers<sup>1</sup>, Jackson Seymore<sup>2</sup>, Martanda Gautam<sup>2</sup>, Konstantin Dörholt<sup>3</sup>, Yannik Müller<sup>1</sup>,  
5 Andreas Arndt<sup>2</sup>, Laura Gömmer<sup>2</sup>, Florian Ungeheuer<sup>3</sup>, Miklós Szakáll<sup>2</sup>, Stephan Borrmann<sup>2,4</sup>, Alexander  
Theis<sup>4</sup>, Alexander L. Vogel<sup>3</sup>, Thorsten Hoffmann<sup>1</sup>

<sup>1</sup>Department of Chemistry, Johannes Gutenberg University, Mainz, Germany

<sup>2</sup>Institute for Atmospheric Physics, Johannes Gutenberg University, Mainz, Germany

<sup>3</sup>Institute for Atmospheric and Environmental Sciences, Goethe-University Frankfurt/Main, Germany

10 <sup>4</sup>Particle Chemistry Department, Max Planck Institute for Chemistry, Mainz, Germany

*Correspondence to:* Thorsten Hoffmann (t.hoffmann@uni-mainz.de)

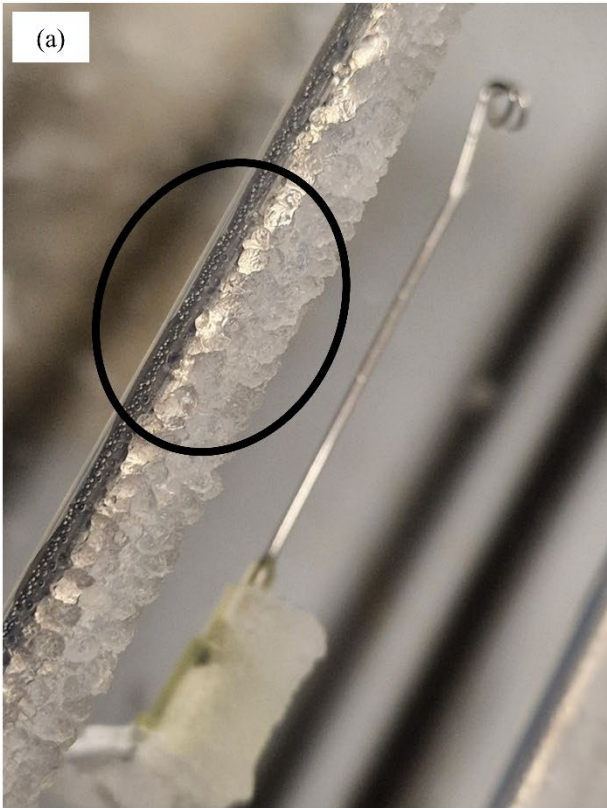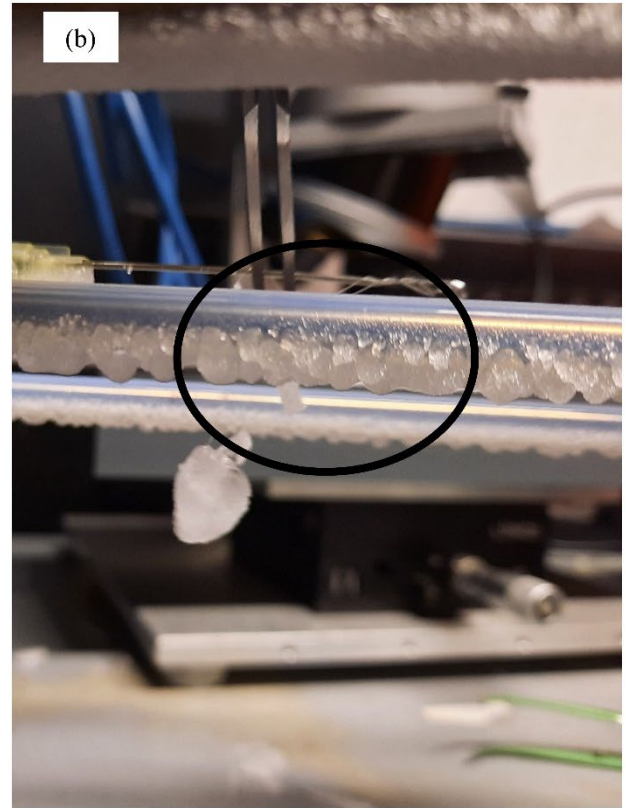

**Figure S1: Photo of ice grown under dry (a) and wet (b) growth conditions.**

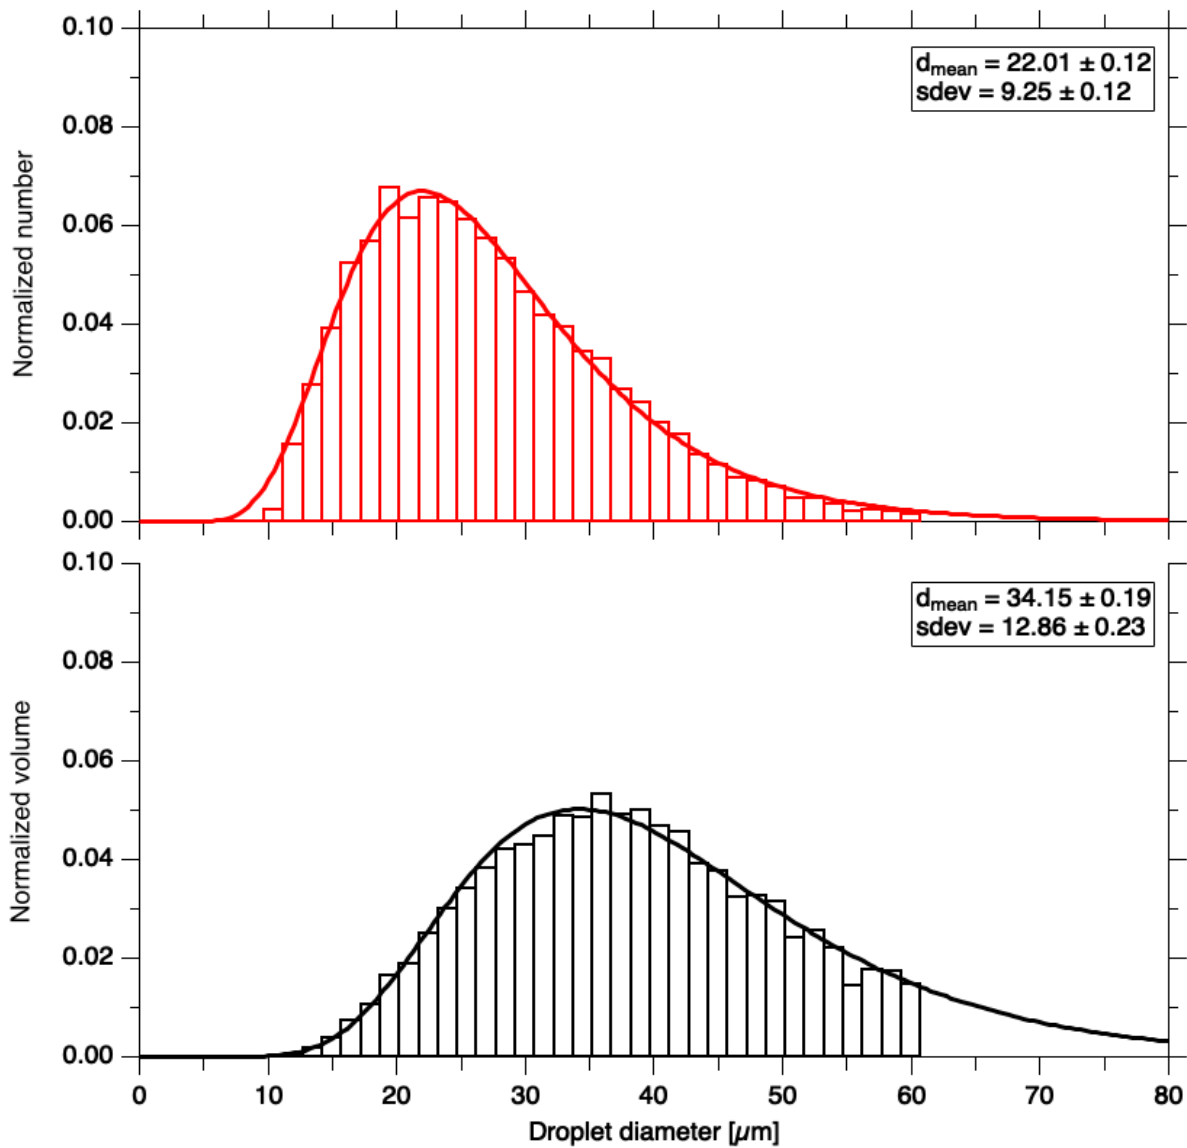

20 Figure S2: Normalized droplet number (a) and volume distribution (b) of the supercooled droplets generated using four spraying nozzles. The lines represent the log-normal fit functions.

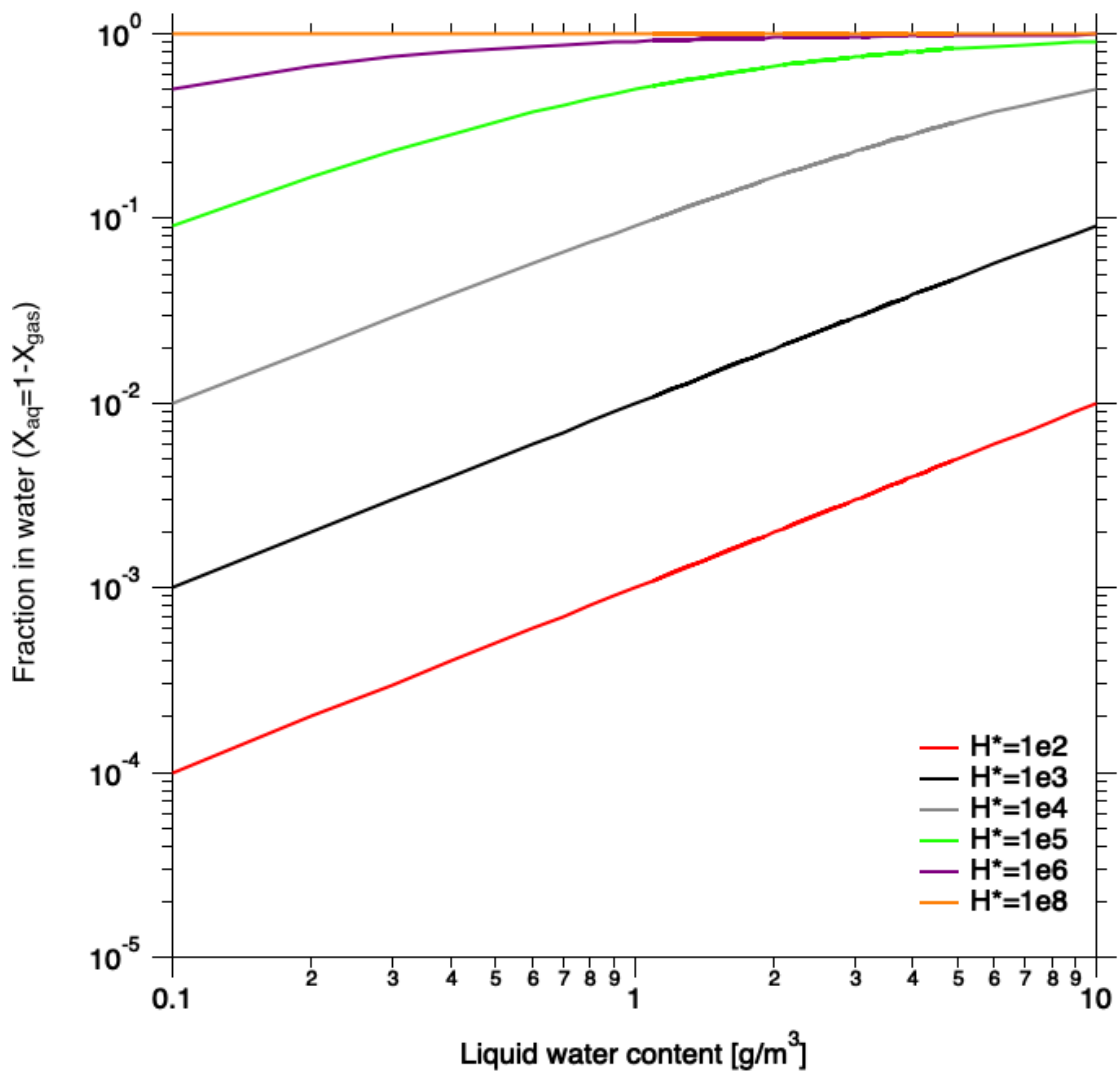

25 Figure S3: Equilibrium distribution of species between the liquid and gas phase in a confined system as function of the LWC. Figure according to Seinfeld und Pandis (2006).

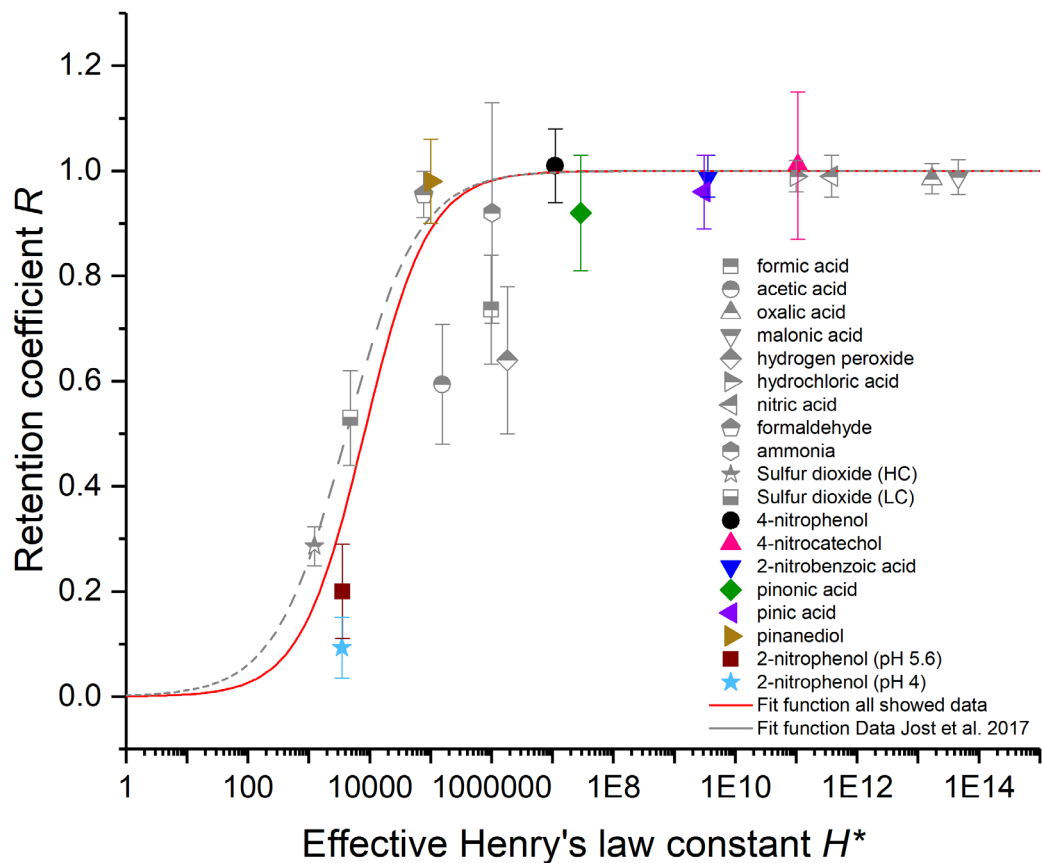

30 **Figure S4: Retention coefficient as a function of  $H^*$ . Colorful filled symbols: substances investigated in the present study. Grey symbols: wind tunnel data from earlier studies (Jost et al. 2017; v. Blohn et al. 2013; 2011). Fit function:  $R_{H^*} = (1 + (a / H^*)^b)^{-1}$ . Red solid line: new fit to wind tunnel data with all substances ( $a_{\text{red}} = (8.10 \pm 2.70) \cdot 10^4$  and  $b_{\text{red}} = 0.82 \pm 0.18$ ). Grey dashed line: fit of only the grey data points  $a_{\text{grey}} = (4.15 \pm 1.47) \cdot 10^4$  and  $b_{\text{grey}} = 0.74 \pm 0.18$ .**

## Literature

- 35 Jost, Alexander; Szakáll, Miklós; Diehl, Karoline; Mitra, Subir K.; Borrmann, Stephan (2017): Chemistry of riming: the retention of organic and inorganic atmospheric trace constituents. In: *Atmos. Chem. Phys.* 17 (16), S. 9717–9732. DOI: 10.5194/acp-17-9717-2017.
- Seinfeld, John H.; Pandis, Spyros N. (2006): Atmospheric chemistry and physics of air pollution. 2nd ed. New York: Wiley.
- v. Blohn, Nadine; Diehl, K.; Mitra, S. K.; Borrmann, S. (2011): Wind tunnel experiments on the retention of trace gases during riming: nitric acid, hydrochloric acid, and hydrogen peroxide. In: *Atmos. Chem. Phys.* 11, 11569–11579. DOI: 40 10.5194/acpd-11-17447-2011.
- v. Blohn, Nadine; Diehl, Karoline; Nölscher, Anke; Jost, Alexander; Mitra, Subir K.; Borrmann, Stephan (2013): The retention of ammonia and sulfur dioxide during riming of ice particles and dendritic snow flakes: laboratory experiments in the Mainz vertical wind tunnel. In: *J Atmos Chem* 70 (2), S. 131–150. DOI: 10.1007/s10874-013-9261-x.
